# Supplementary material for: Characterization of novel CTNNB1 mutation in Craniopharyngioma by whole-genome sequencing
Source: PubMed Central journal article supplement (PMC8684236; doi:10.1186/s12943-021-01468-7), 2021-12-18
Supplement: 12943_2021_1468_MOESM2_ESM.pdf [file 12943_2021_1468_MOESM2_ESM.pdf]

## Supplementary Figures

**Fig S1.** The age and gender distribution of ACP and PCP group.

**Fig S2.** The correlation between somatic mutation number and age.

**Fig S3.** Structure alterations called in each patient.

**Fig S4.** Kataegis analysis of somatic mutations (SNVs and InDels) in each patient.

**Fig S5.** The proportion of 96 different extending possible base-pair substitutions of all SNVs identified in ACPs and 10 PCPs.

**Fig S6.** Schematics for genes listed in Fig. 3a indicating the location of the identified mutations.

**Fig S7.** IGV graphic report for the alignment of deletion in CTNNB1 CP111 tumor and normal blood sample.

**Fig S8.** IGV graphic report for the alignment of nonsense mutation of W425X in FBXW7 of CP22 tumor and normal blood sample.

**Fig S9.** CTNNB1 mRNA stability in CTNNB1-WT/Mut 293T/HCT116 cells.

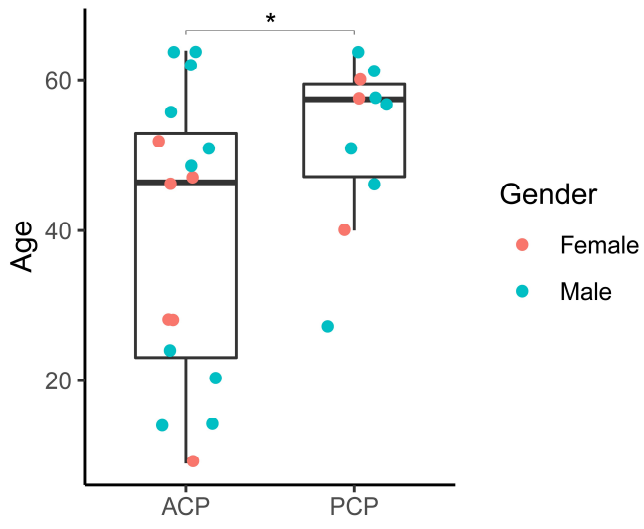

**Fig S1.** The age and gender distribution of ACP and PCP group.

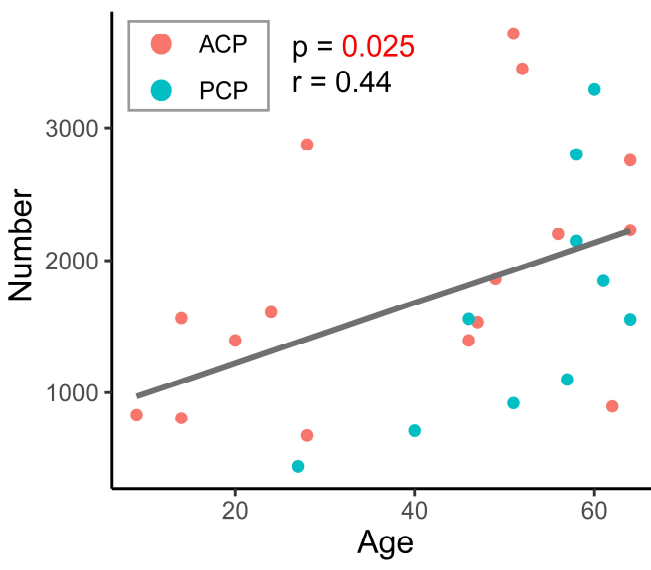

**Fig S2.** The correlation between somatic mutation number and age.



CP24

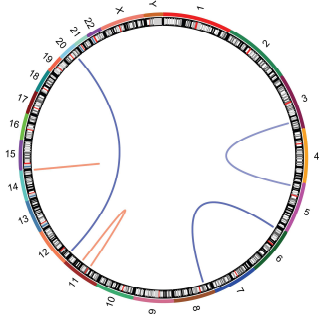

CP25

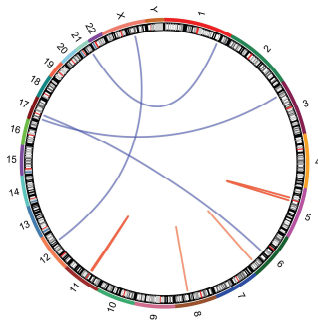

CP26

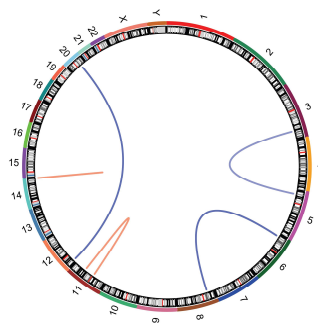

CP27

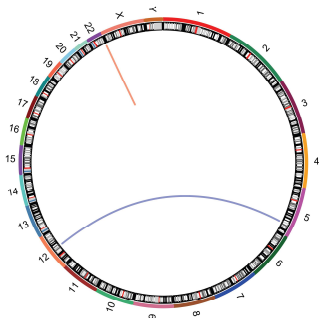

CP28

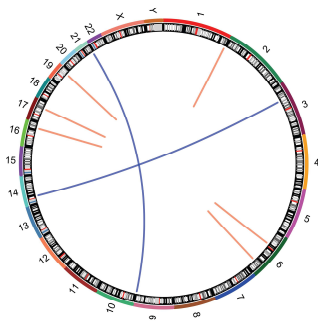

CP31

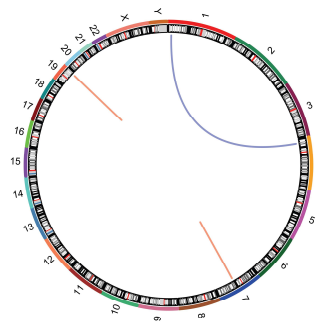

CP32

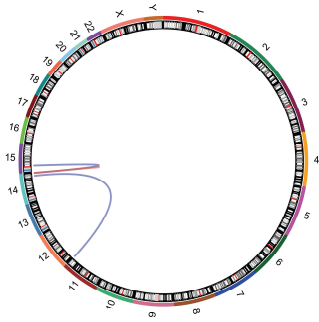

CP33

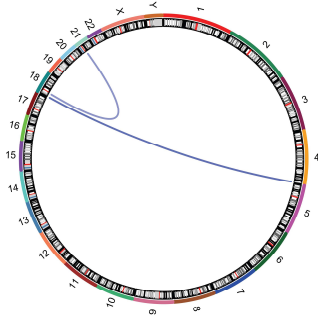

CP34

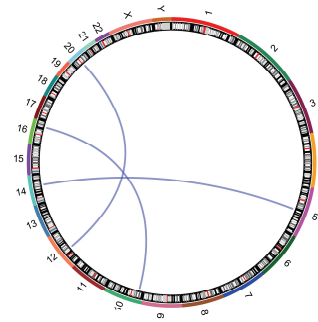

CP111

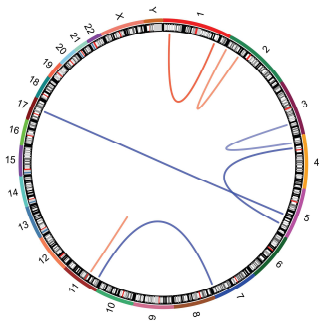

CP133

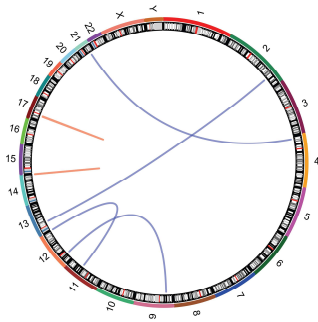

CP176

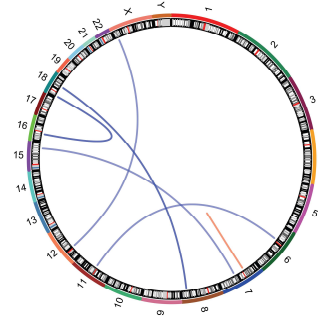



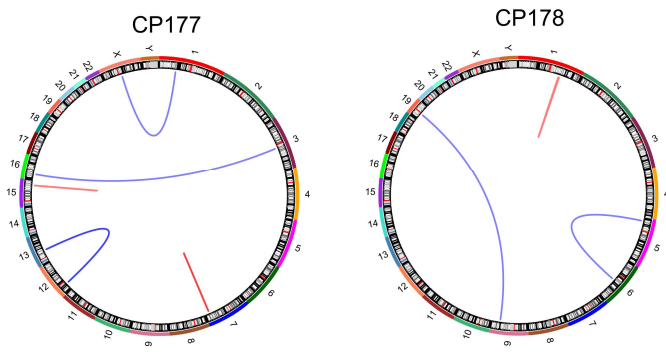

**Fig S3.** Structure alterations called in each patient.

■ C>A   
 ■ C>G   
 ■ C>T   
 ■ T>A   
 ■ T>C   
 ■ T>G   
 ■ Other

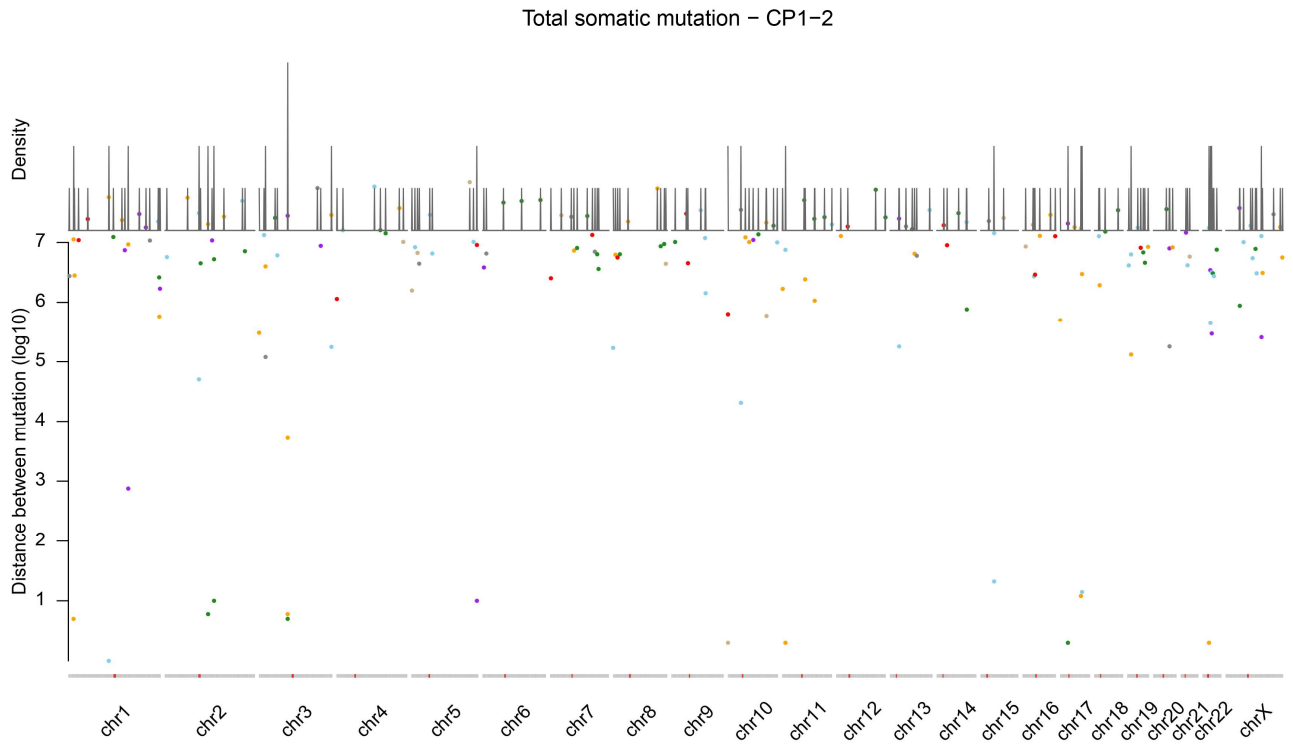

Total somatic mutation - CP11

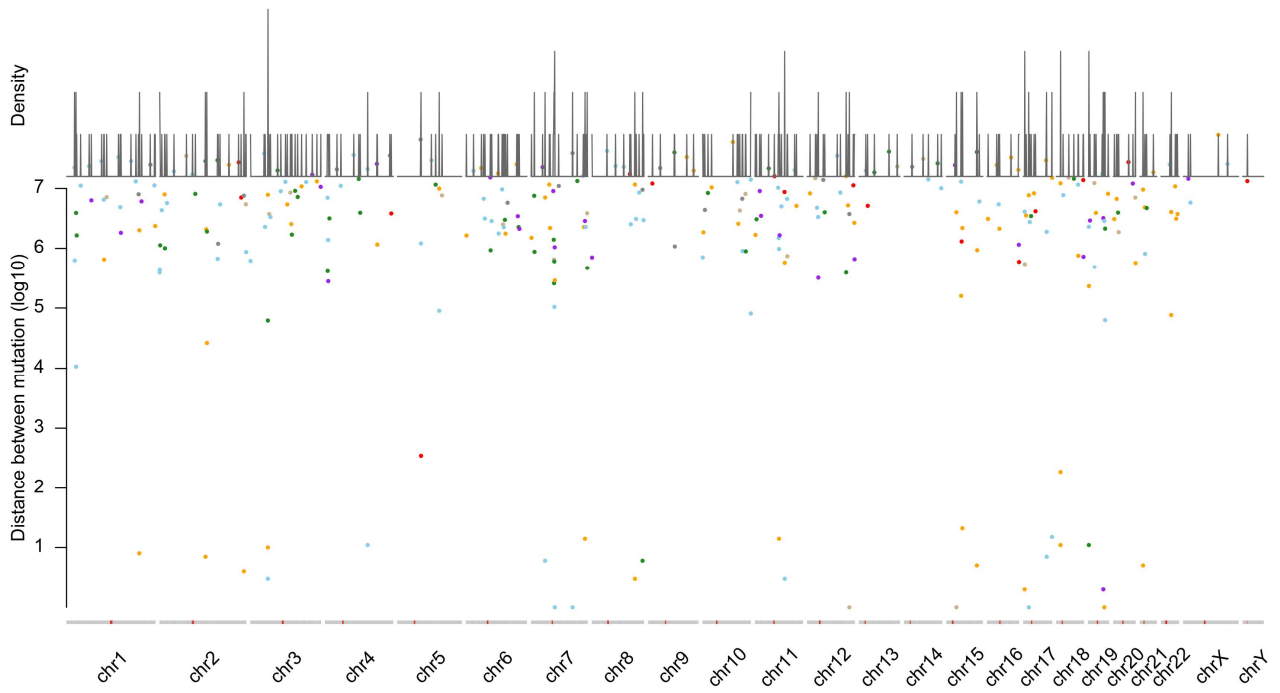

Total somatic mutation - CP12

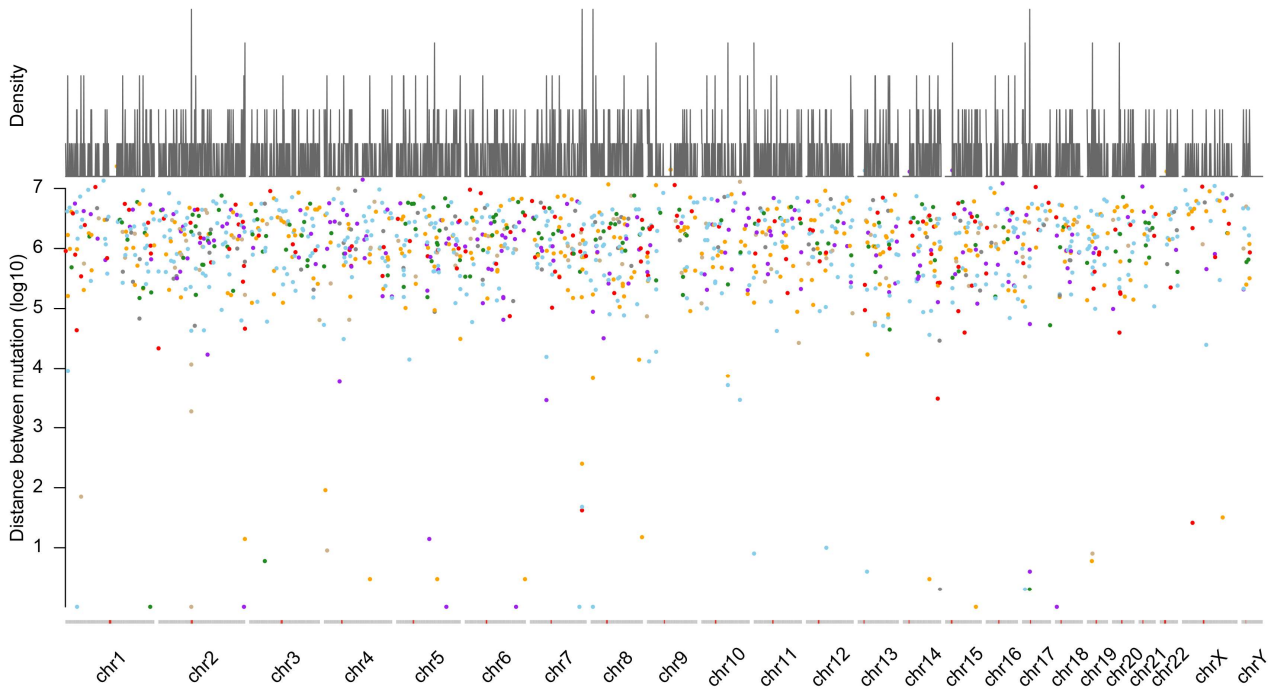

Total somatic mutation – CP13

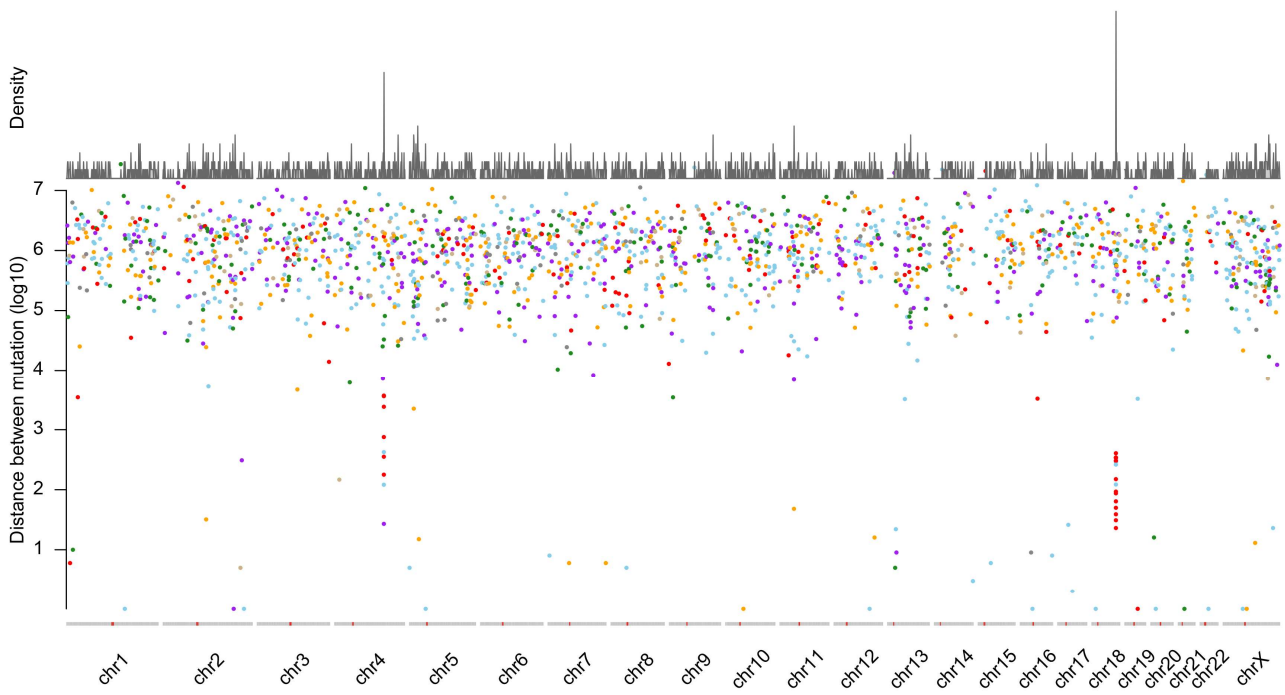

Total somatic mutation – CP15

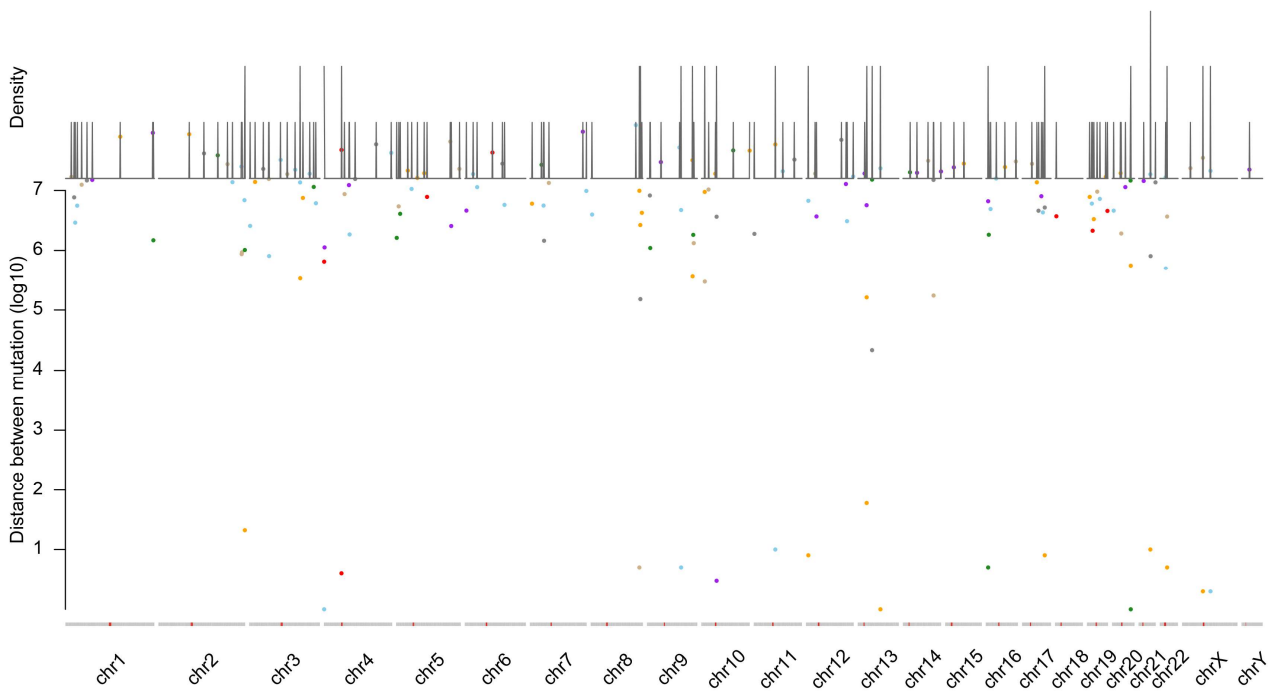

Total somatic mutation - CP16

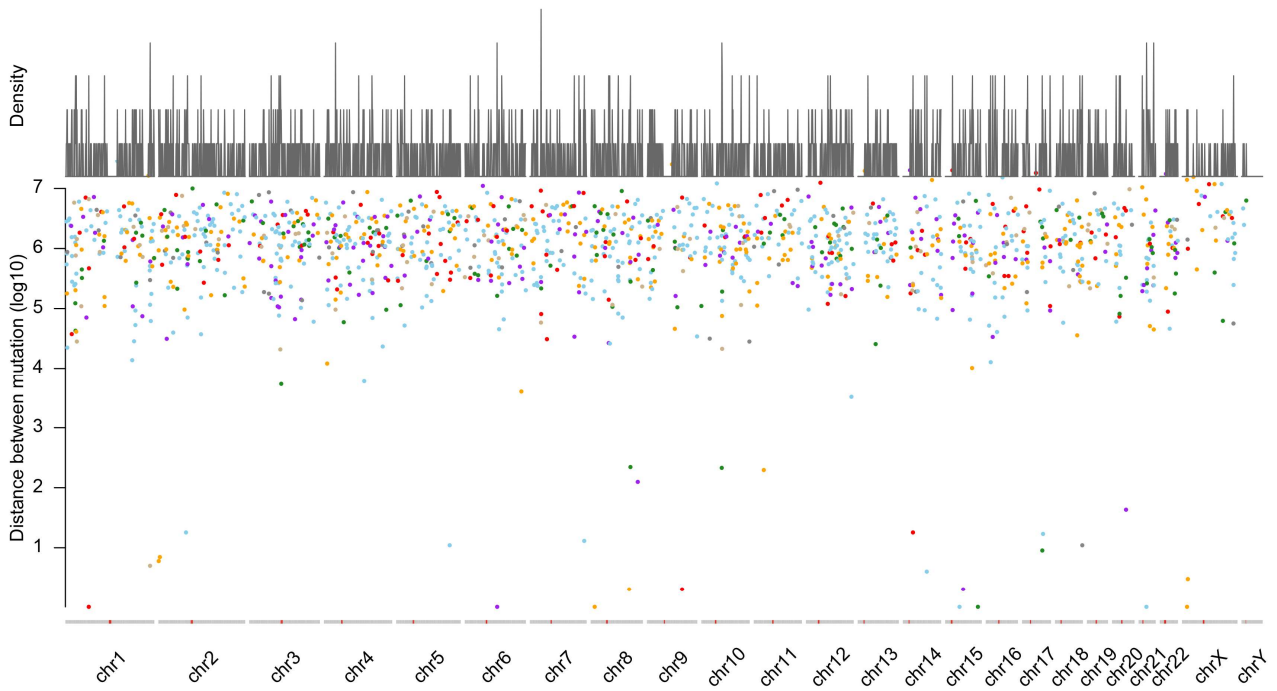

Total somatic mutation - CP18

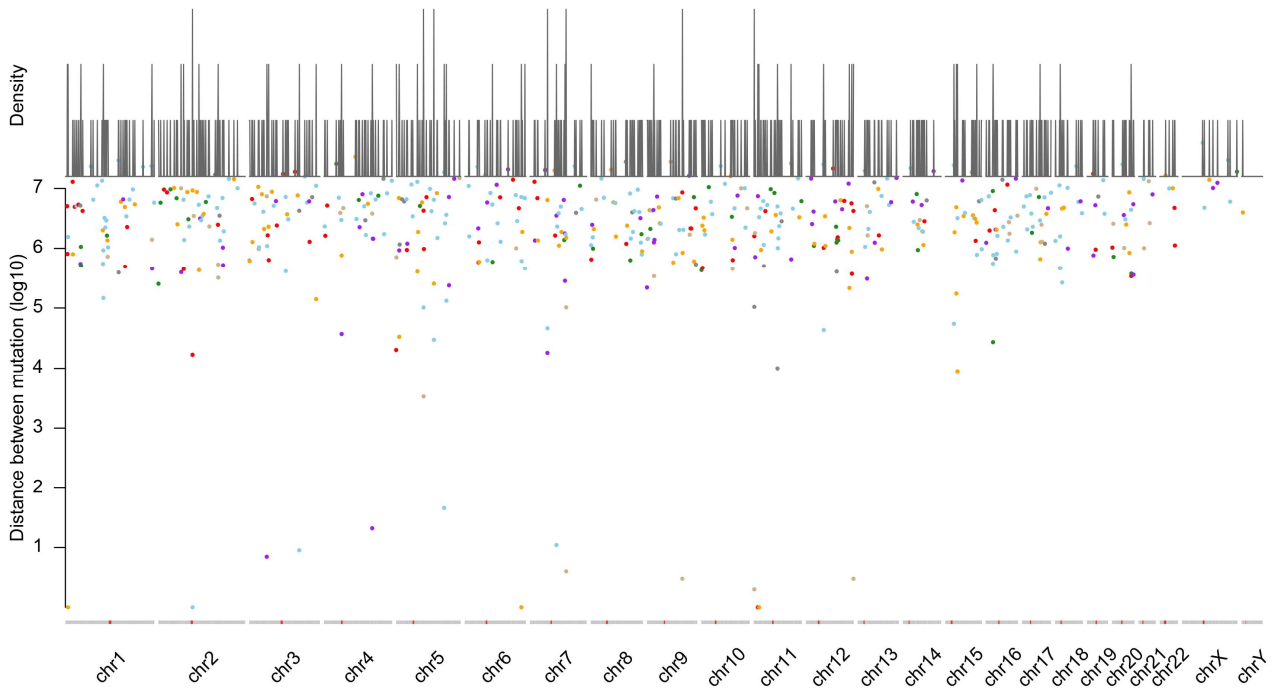

Total somatic mutation – CP19

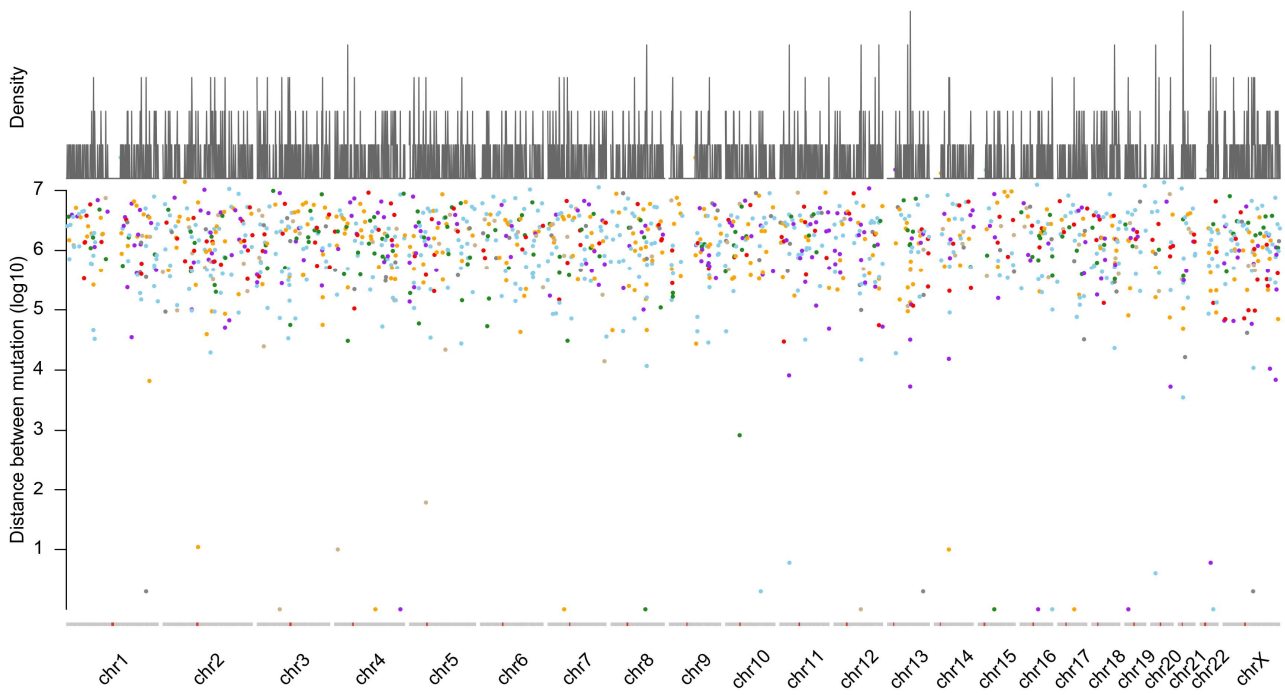

Total somatic mutation – CP20

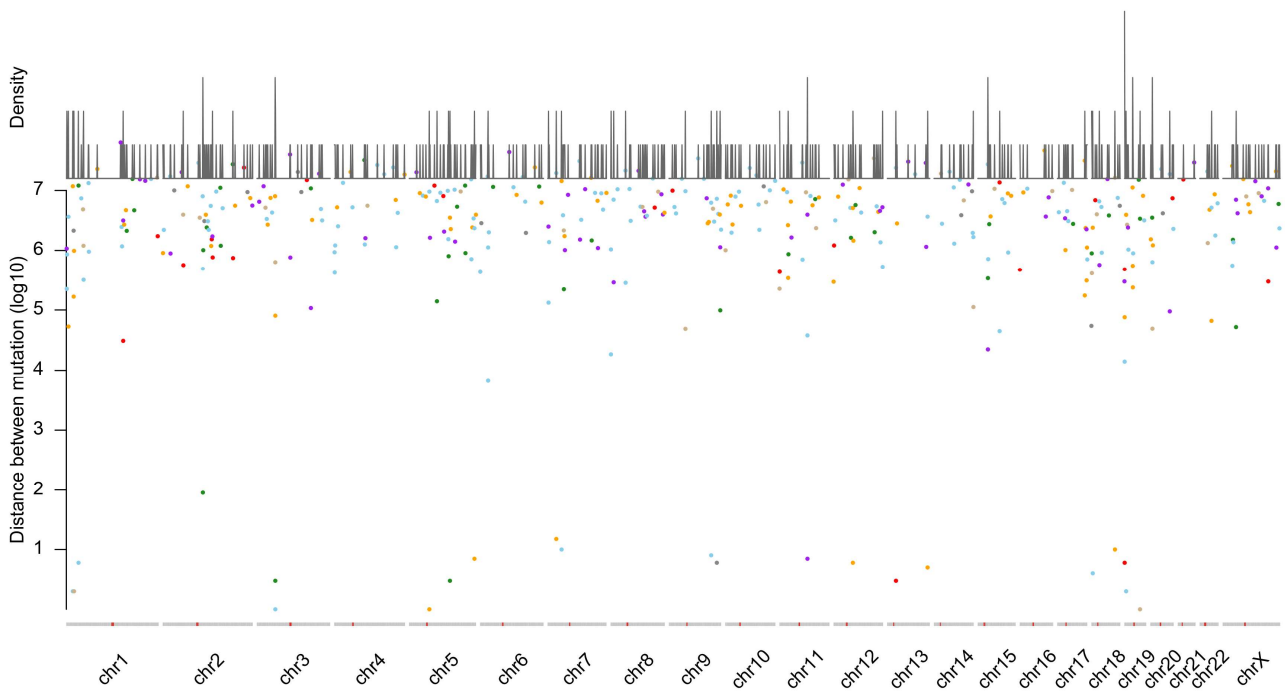

Total somatic mutation - CP21

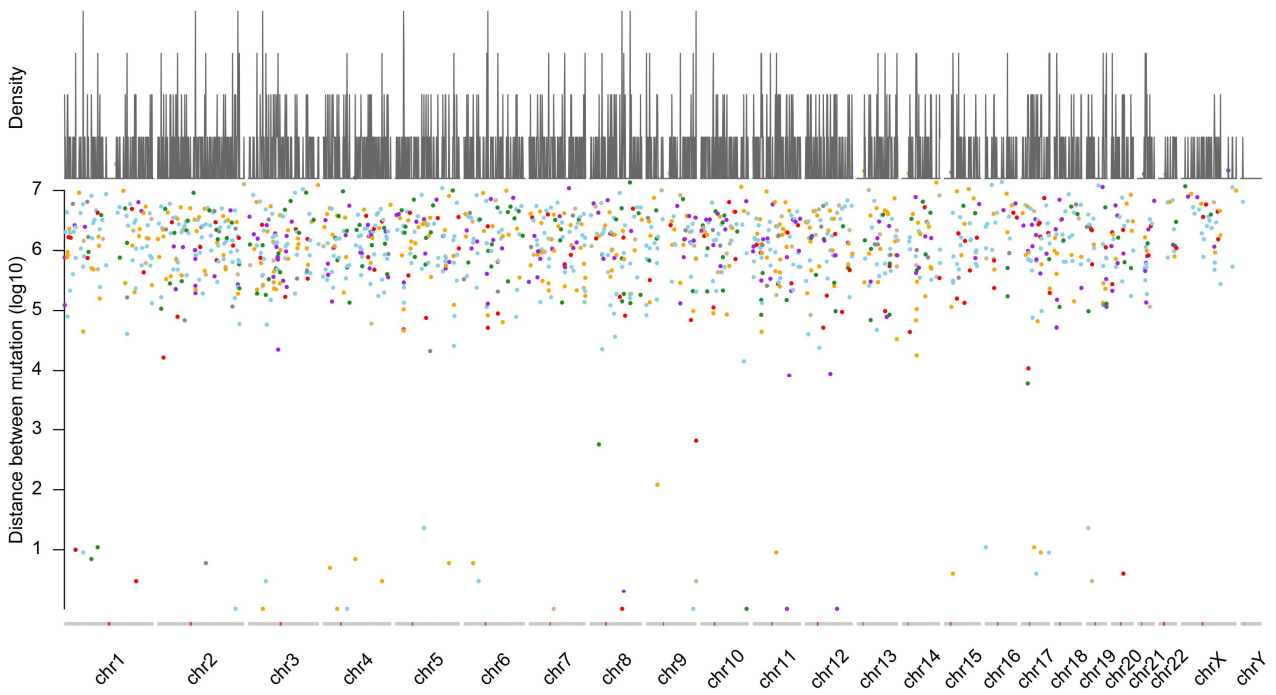

Total somatic mutation - CP22

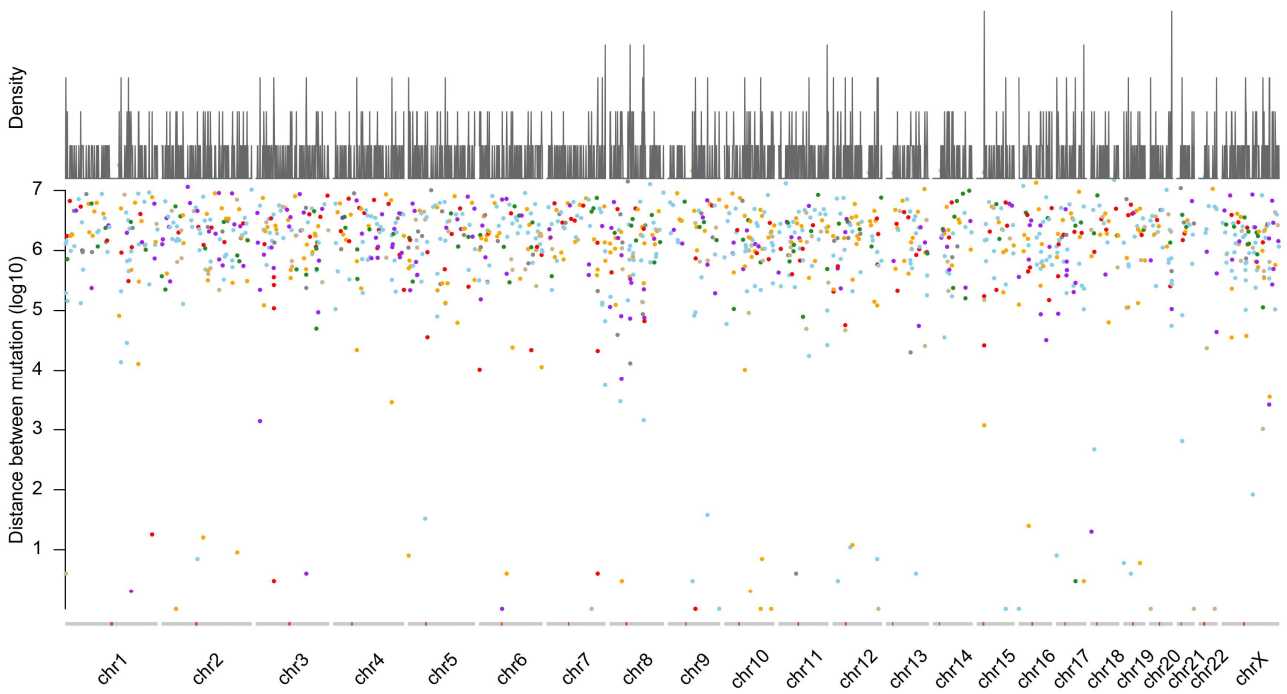

Total somatic mutation - CP23

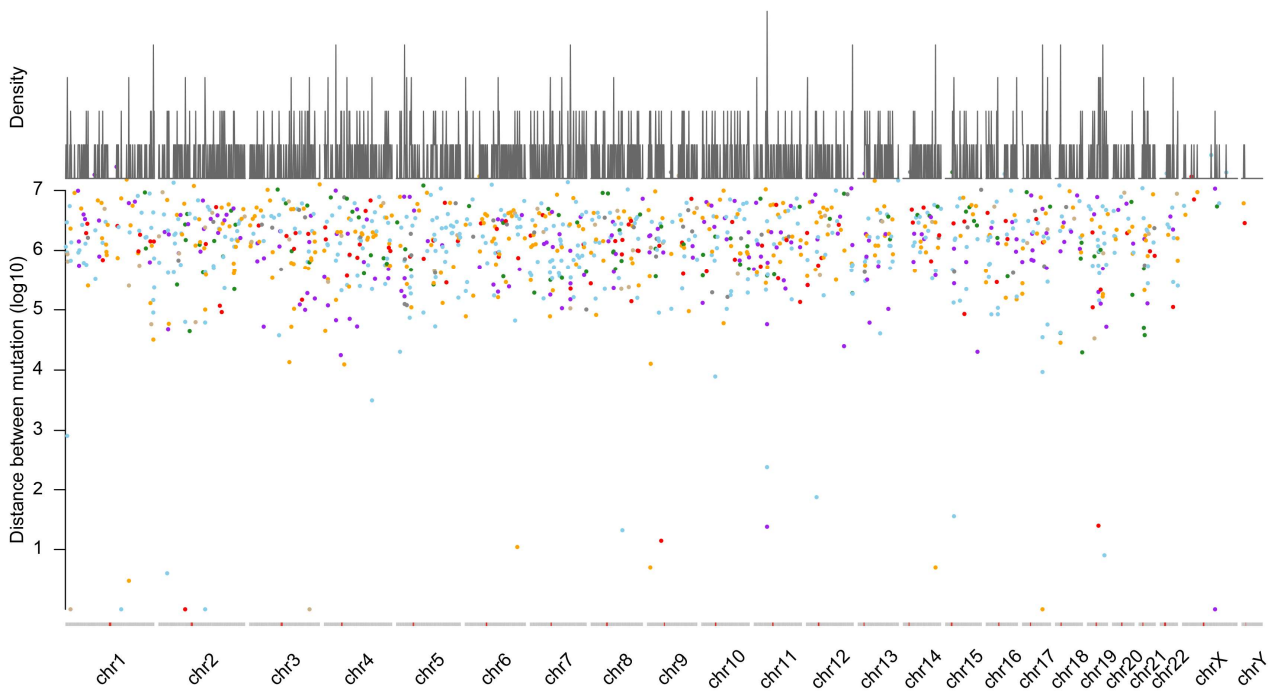

Total somatic mutation - CP24

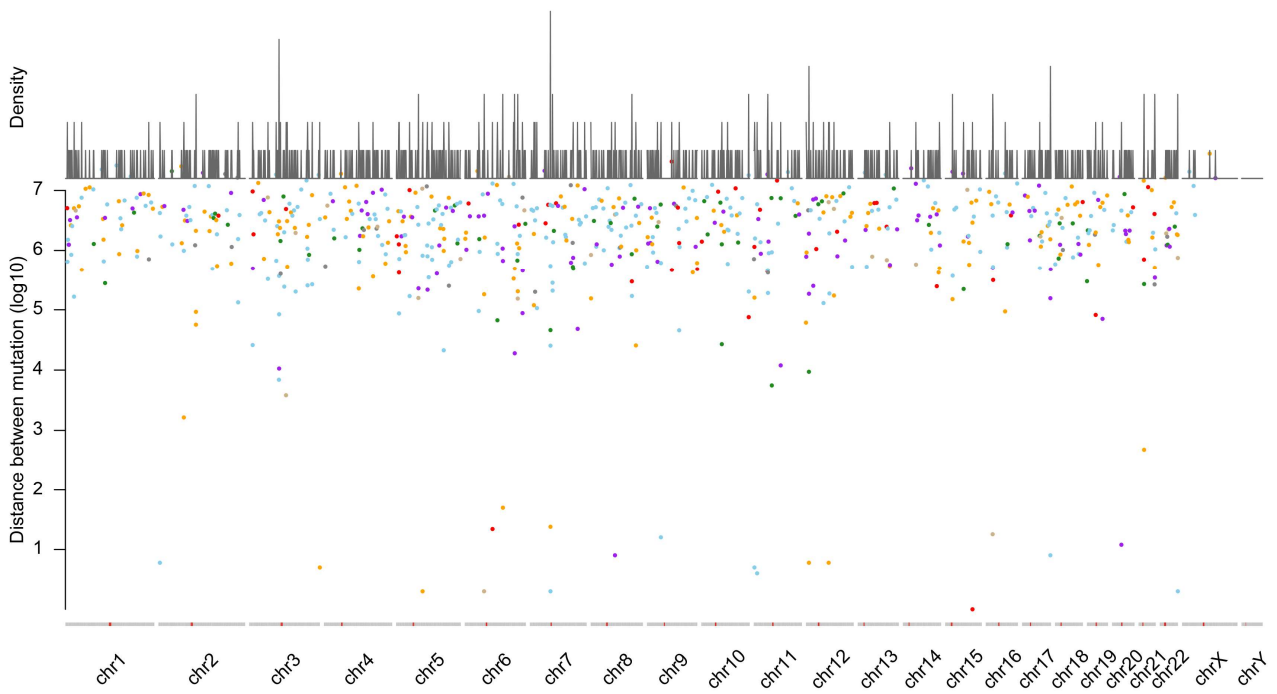

Total somatic mutation – CP25

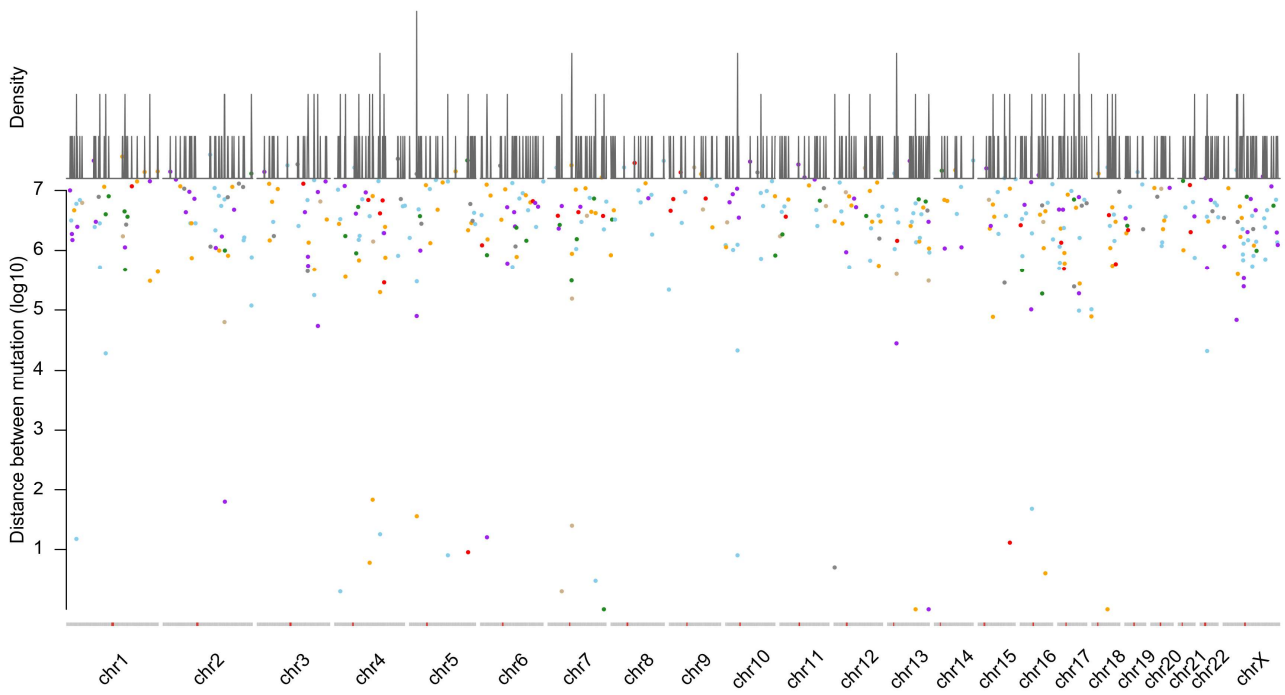

Total somatic mutation – CP26

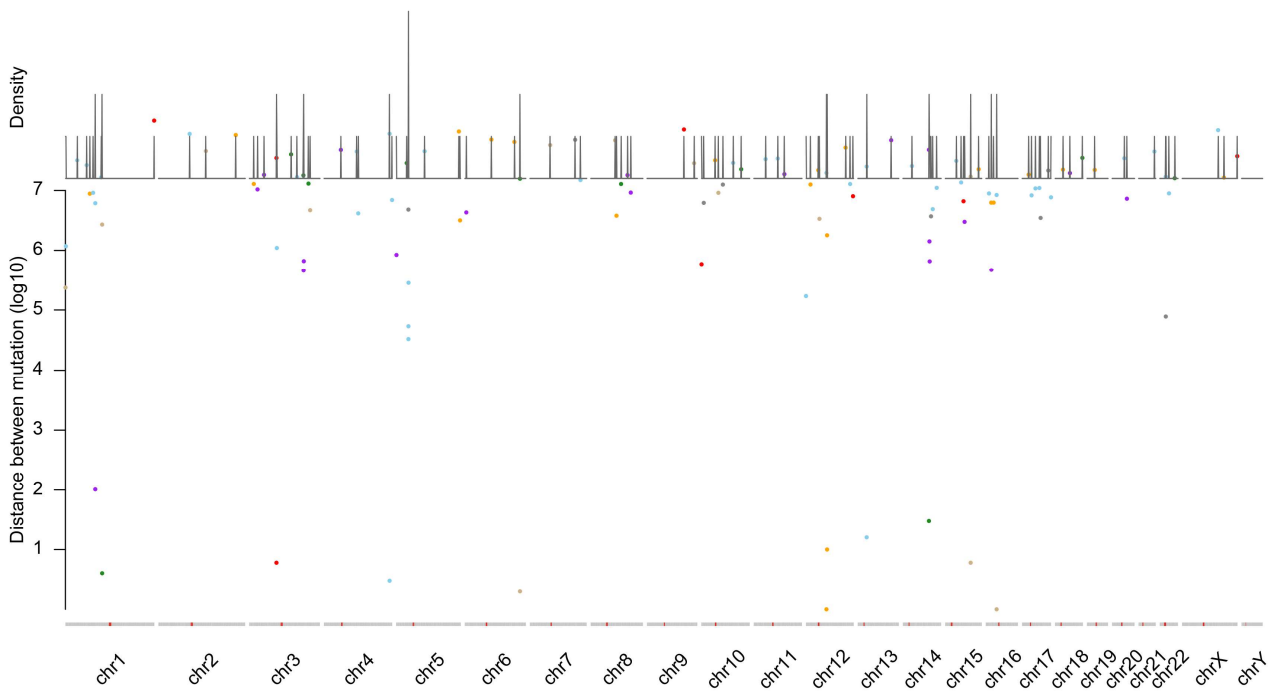



Total somatic mutation – CP27

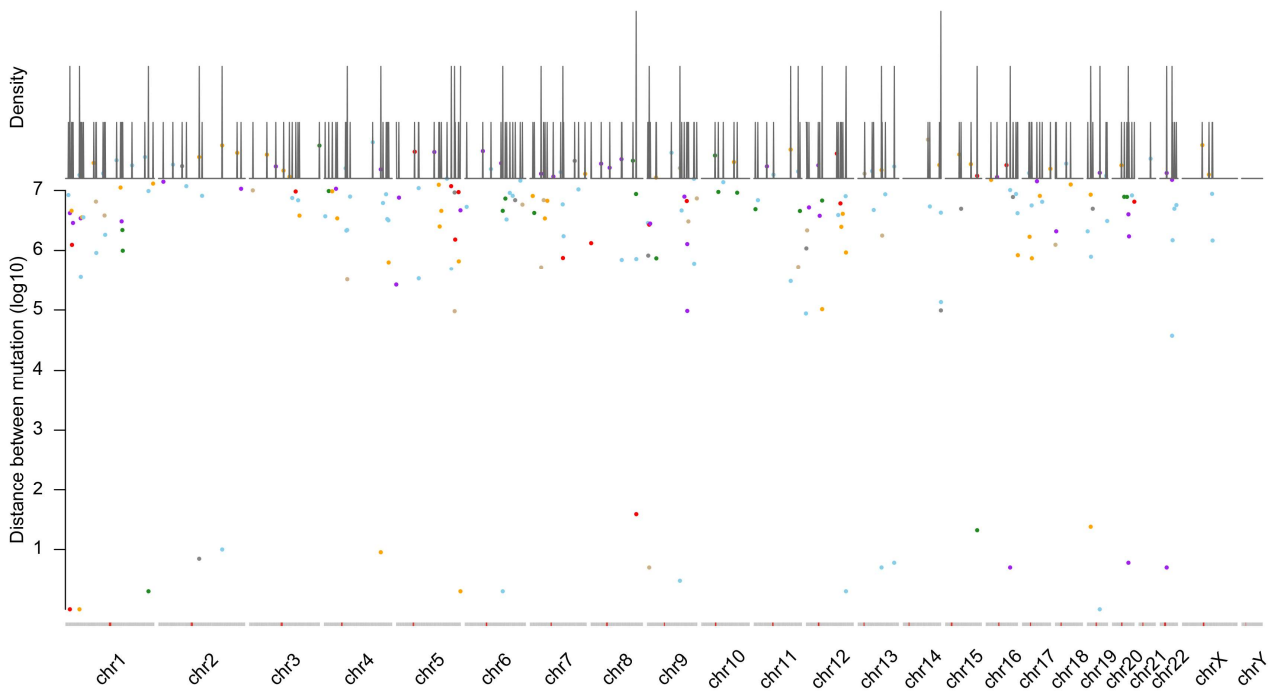

Total somatic mutation – CP28

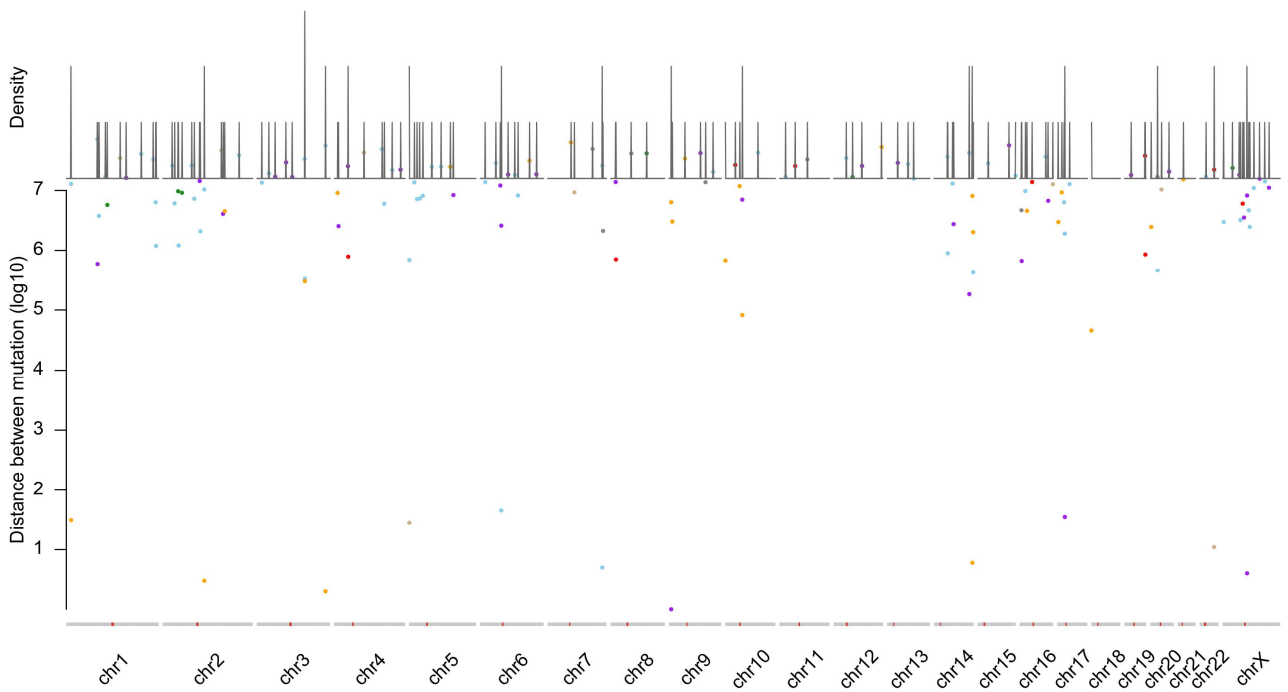

Total somatic mutation - CP31

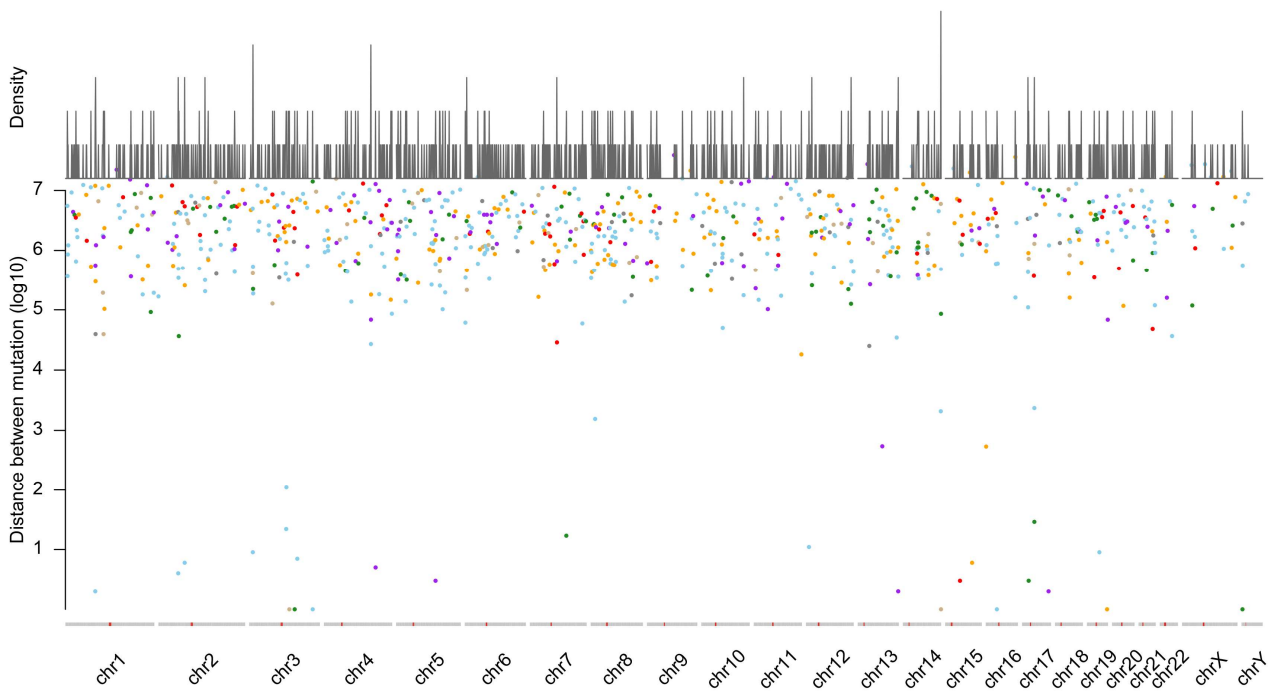

Total somatic mutation - CP32

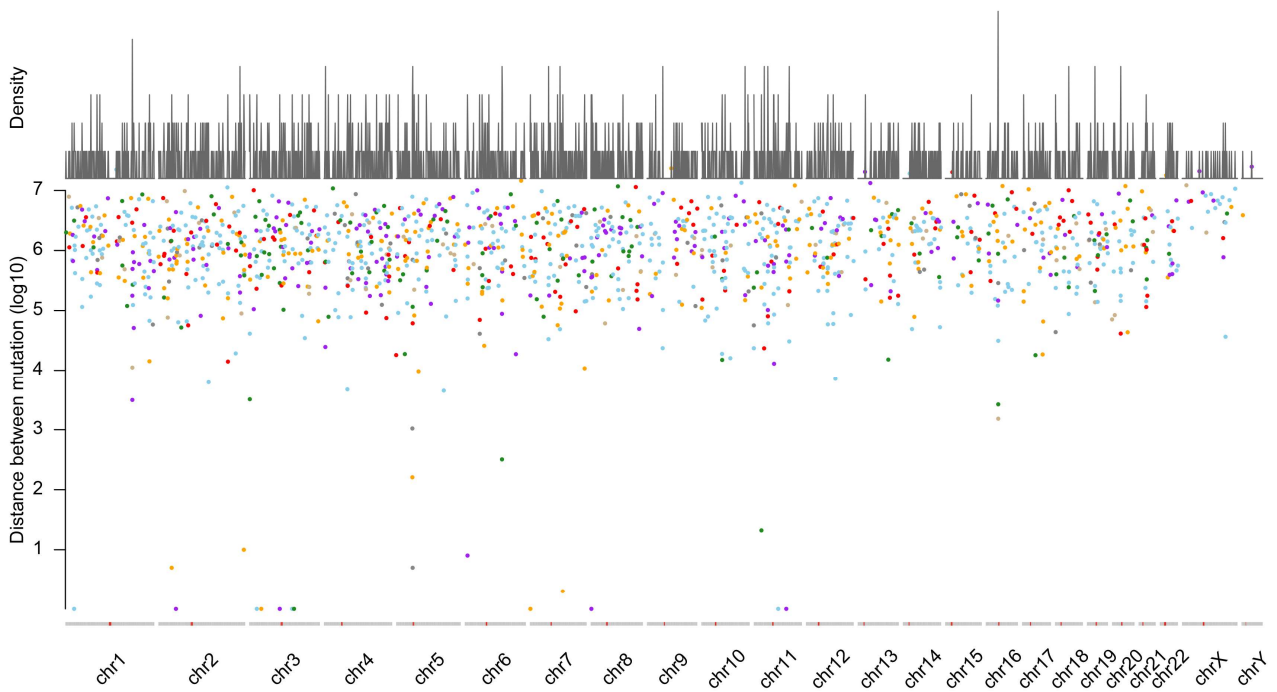

Total somatic mutation – CP33

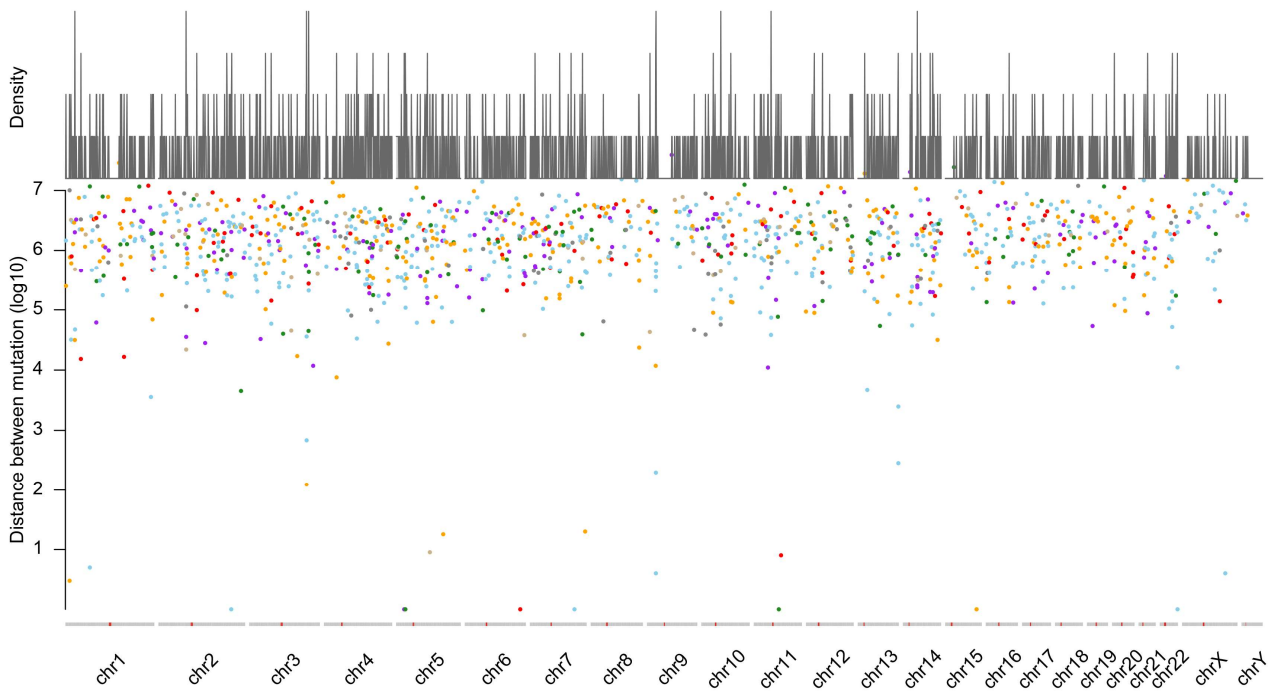

Total somatic mutation – CP34

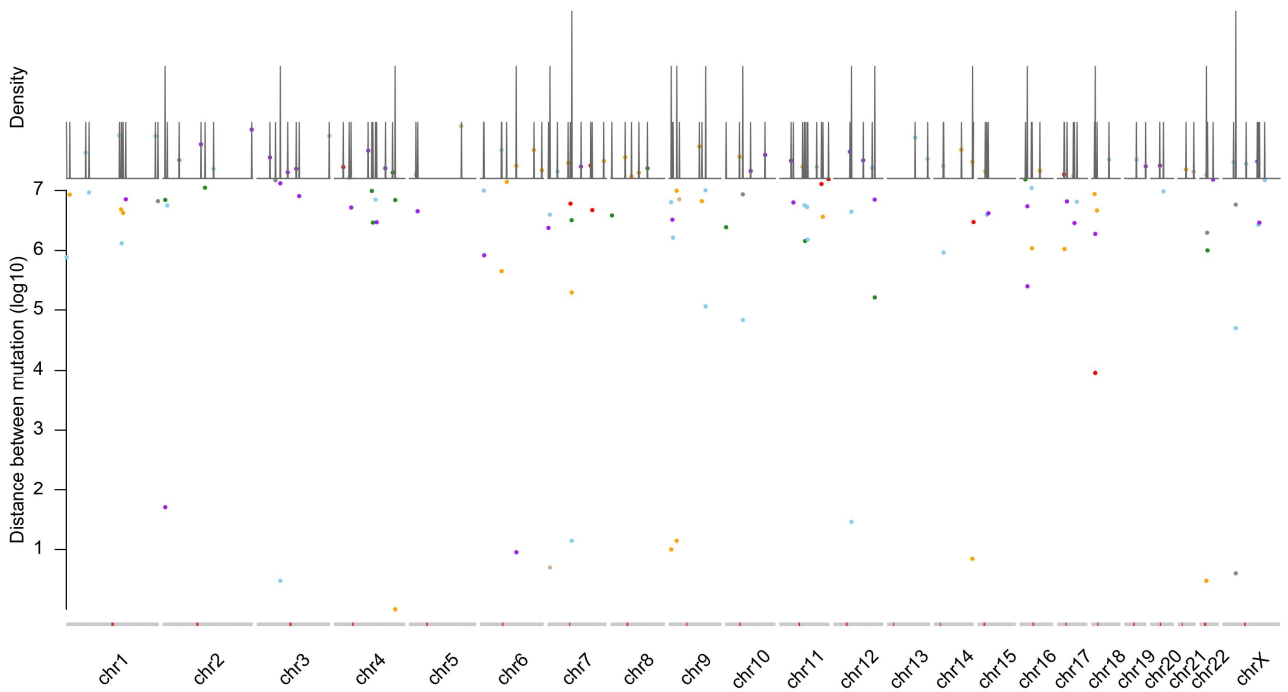

Total somatic mutation – CP111

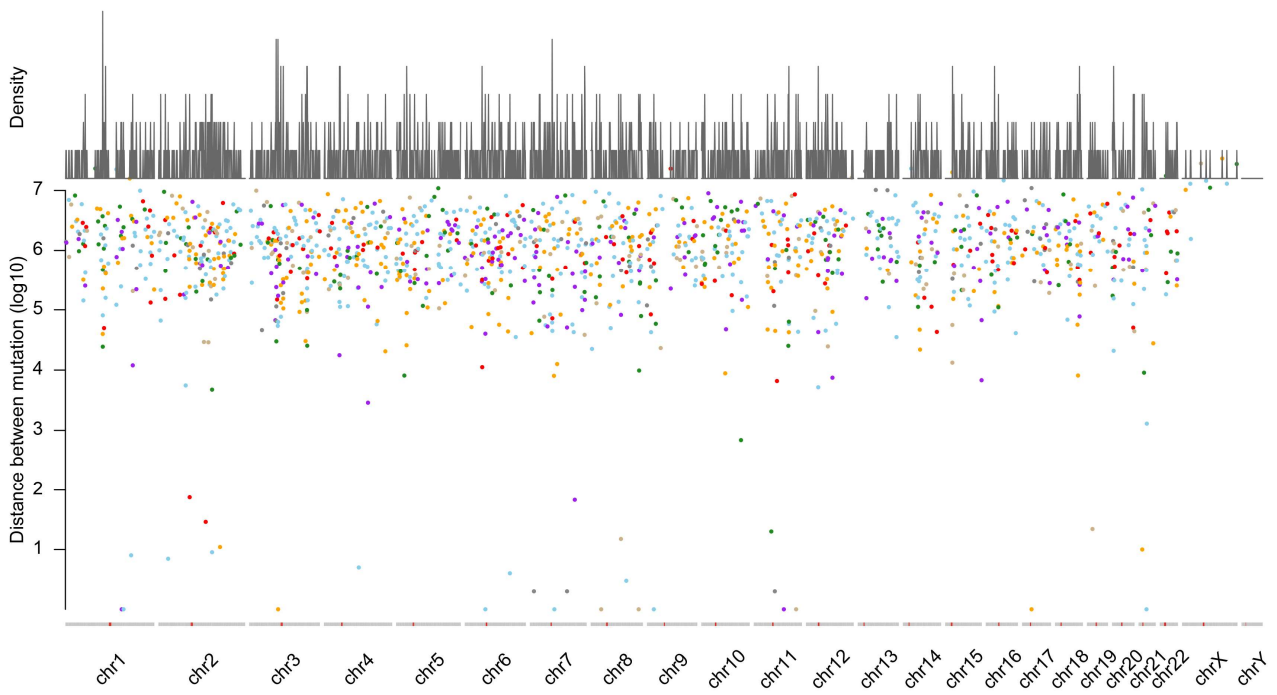

Total somatic mutation – CP133

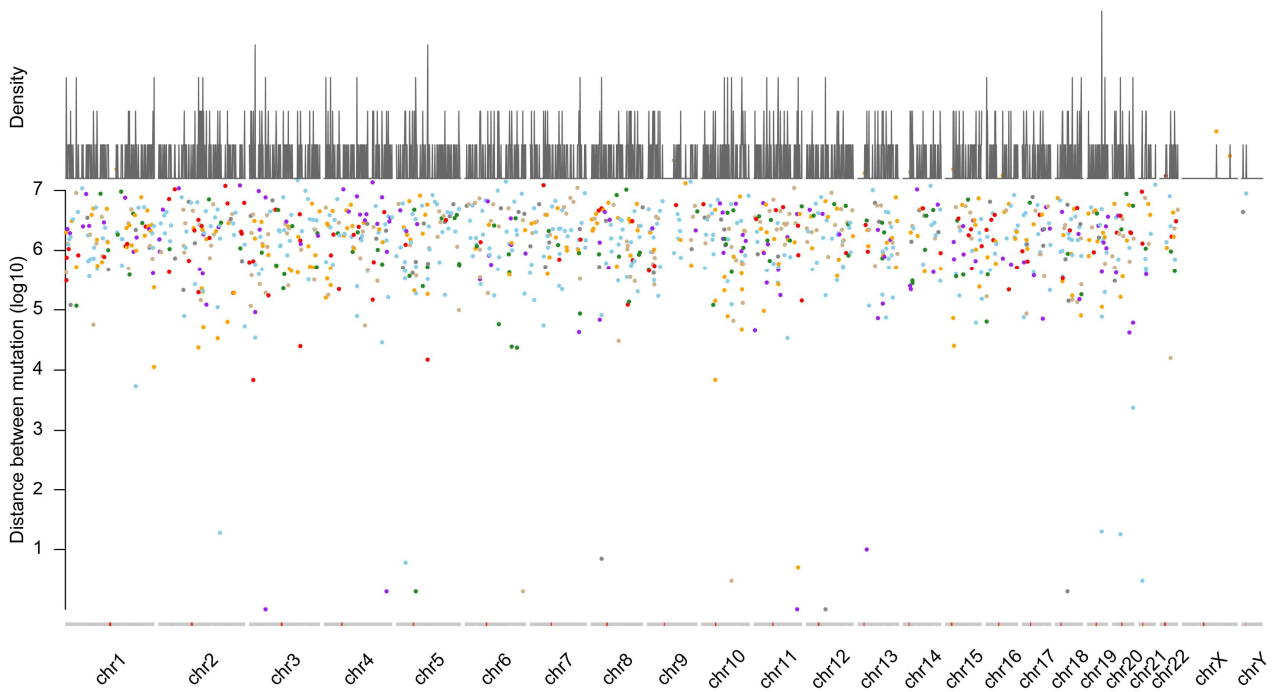

Total somatic mutation – CP176

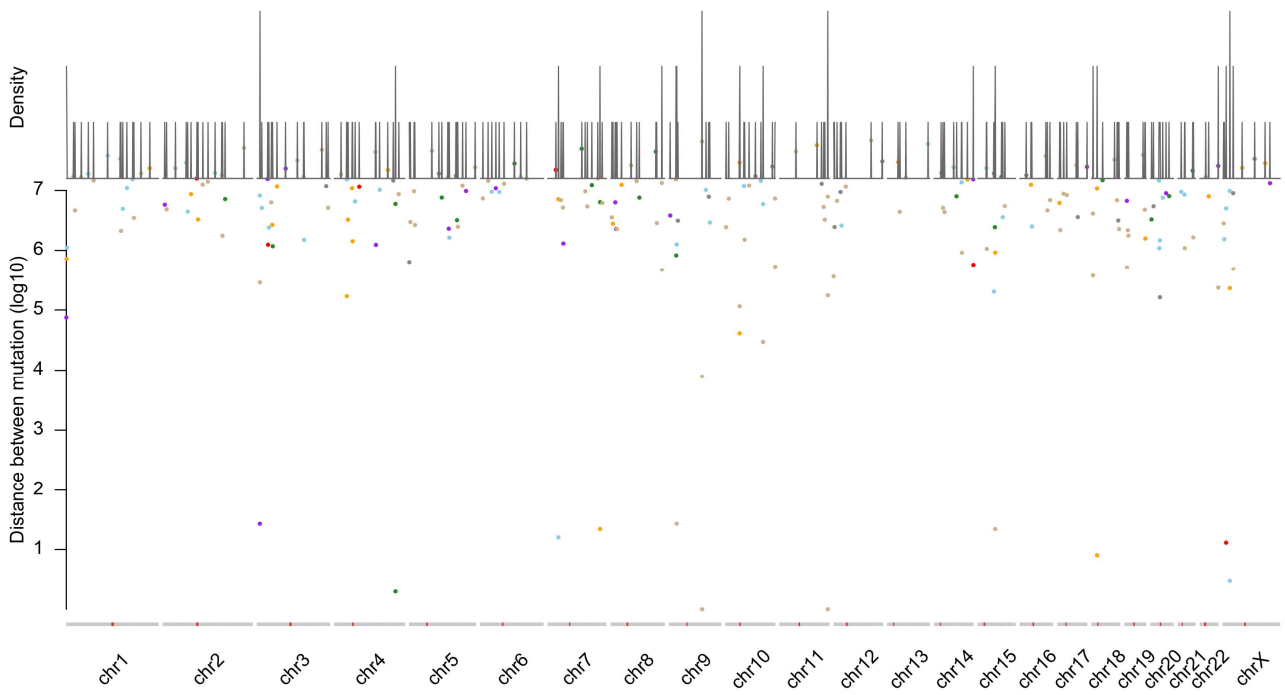

Total somatic mutation – CP177

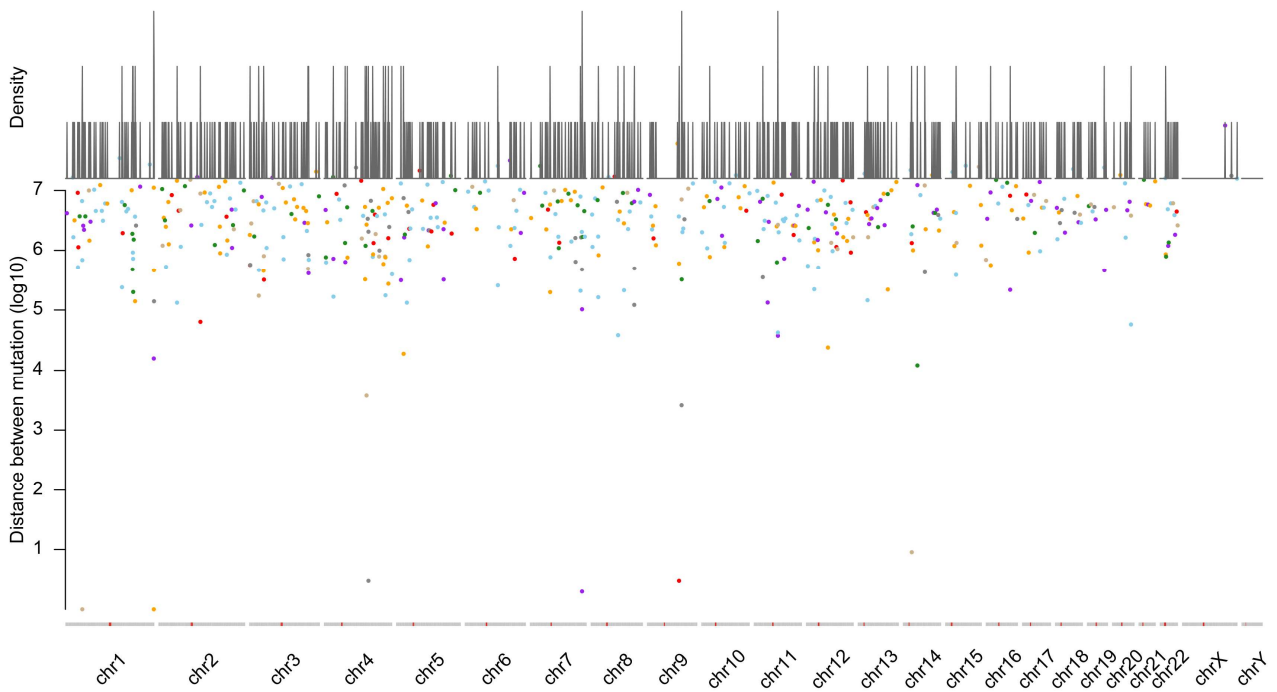

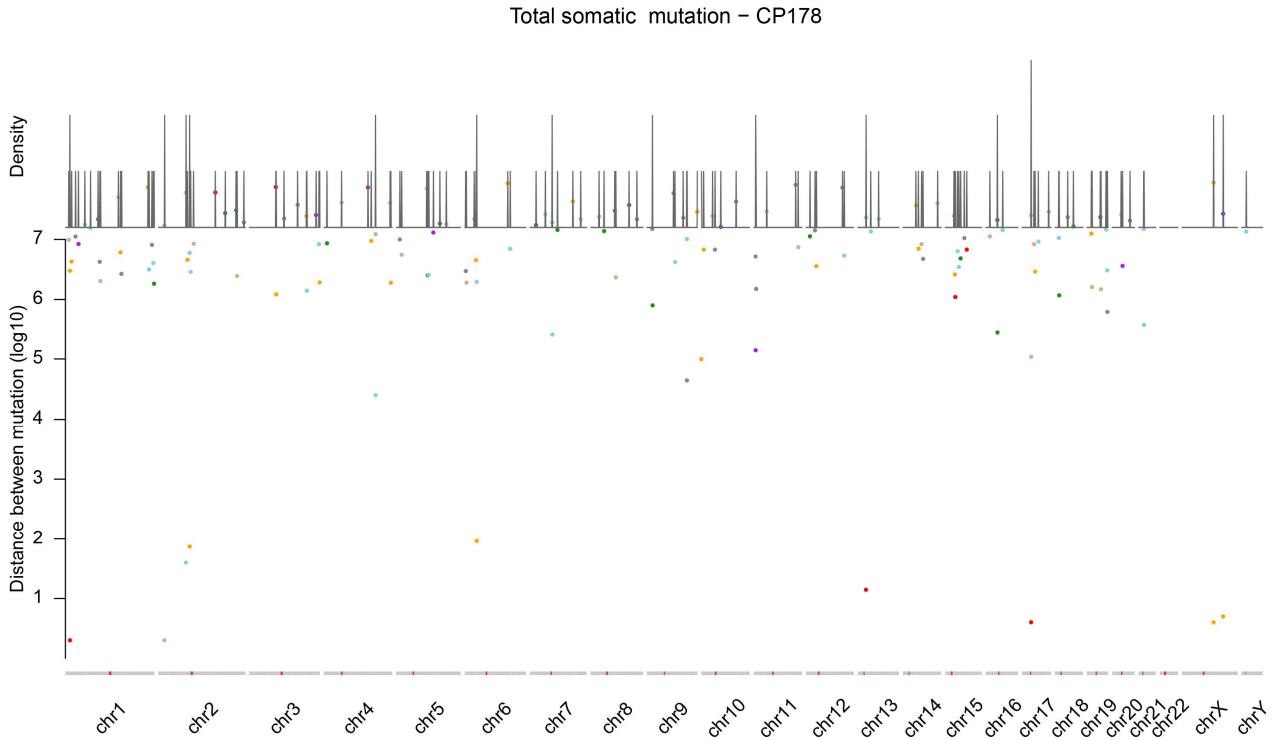

**Fig S4.** Kataegis analysis of somatic mutations (SNVs and InDels) in each patient.

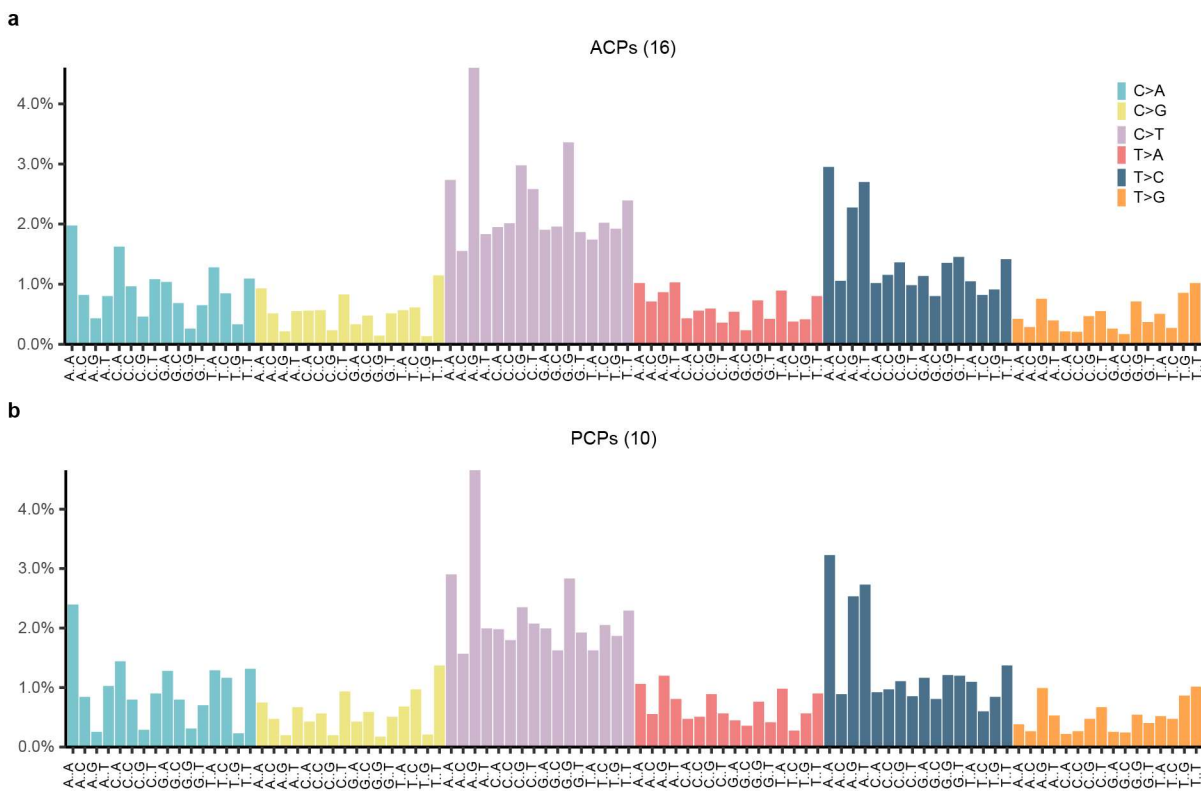

**Fig S5.** The proportion of 96 different extending possible base-pair substitutions of all SNVs identified in 16 ACPs and 10 PCPs.

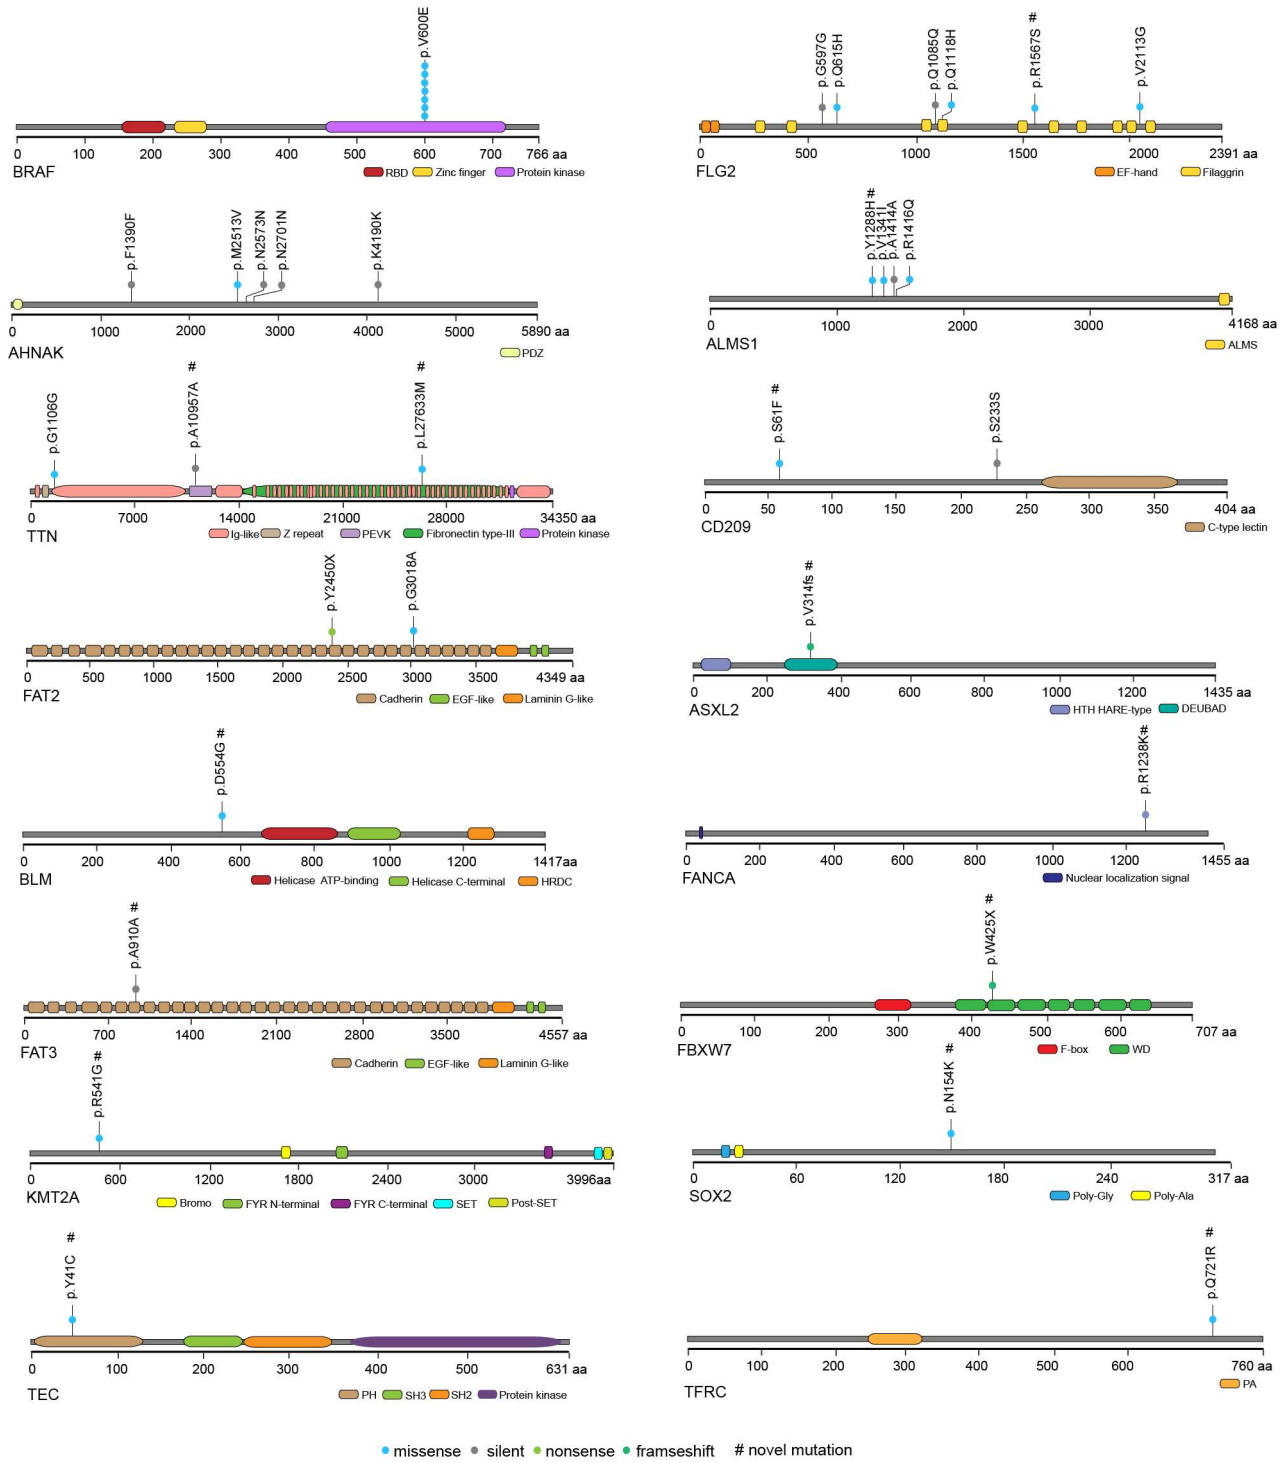

**Fig S6.** Schematics for genes listed in Fig. 3a indicating the location of the identified mutations.

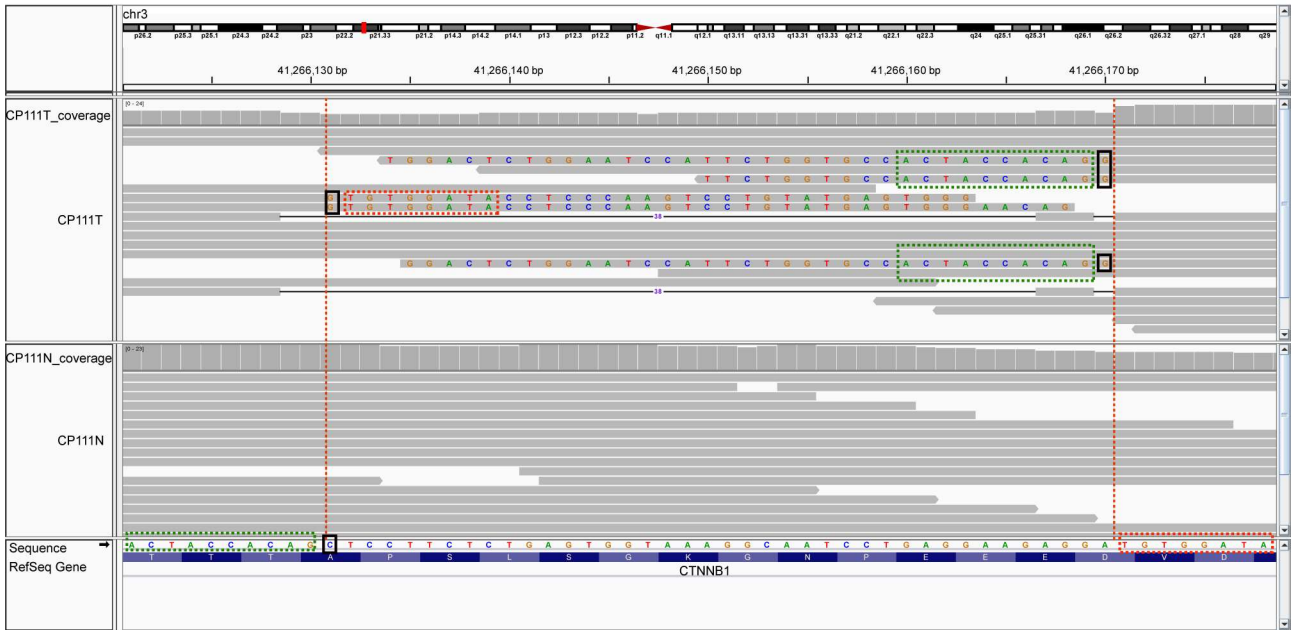

**Fig S7.** IGV graphic report for the alignment of deletion in CTNNB1 CP111 tumor and normal blood sample.

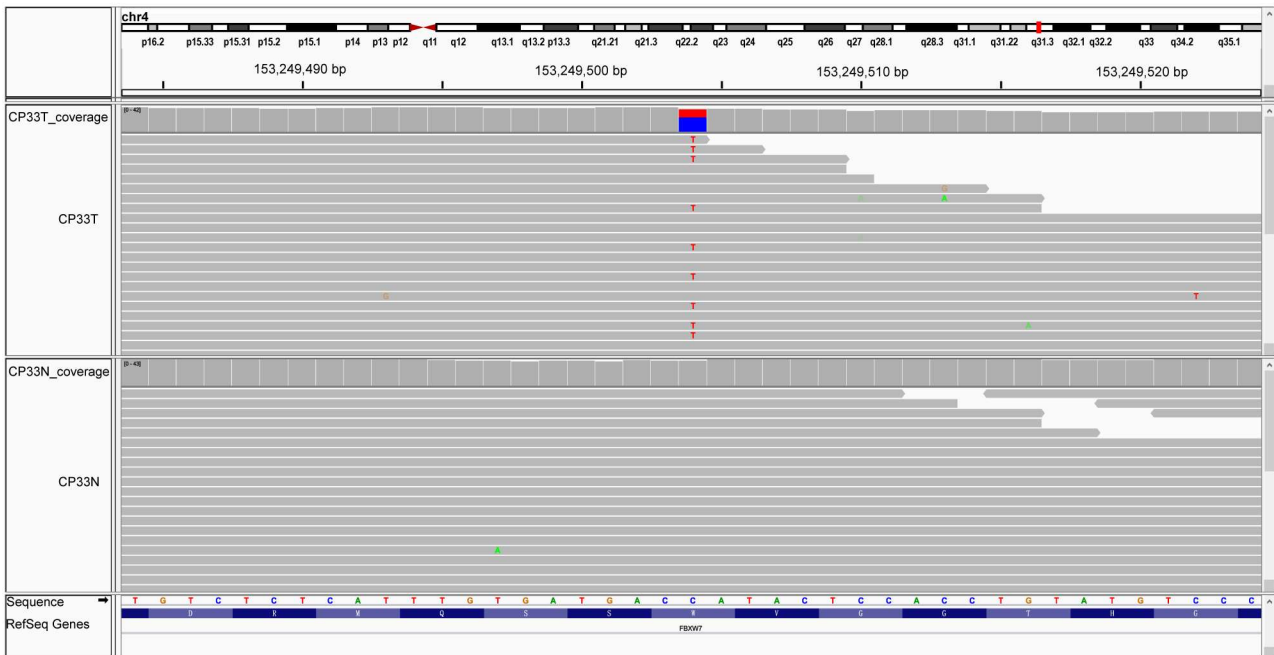

**Fig S8.** IGV graphic report for the alignment of nonsense mutation of W425X in FBXW7 of CP22 tumor and normal blood sample.



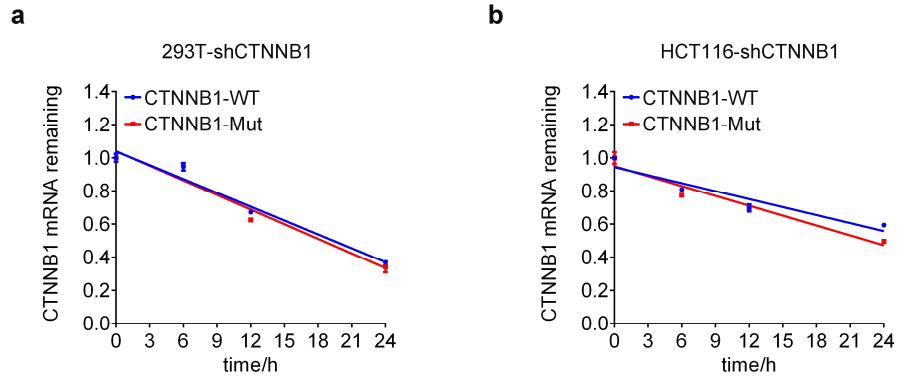

**Fig S9. CTNNB1 mRNA stability in CTNNB1-WT/Mut 293T/HCT116 cells. a-b** CTNNB1 mRNA stability in CTNNB1-WT/Mut 293T/HCT116 treated with 5  $\mu\text{g}/\text{mL}$  actinomycin D at different time points. Actin mRNA was used as a negative control.
